# Supplementary material for: Novel multi-stimuli responsive molecules based on photochromic bithienylethenes containing the tetrathiafulvalene unit
Source: Royal Society of Chemistry journal article supplement (doi:10.1039/c5ra26528b), 2016-01-01
Supplement: c5ra26528b1.pdf [file c5ra26528b1.pdf]

Electronic Supplementary Information (ESI)

**Novel multi-stimuli responsive molecules based on photochromic  
bithienylethenes containing tetrathiafulvalene unit**

Jingyi Zhang, Bingbing Sun, Qiaochun Wang and Lei Zou\*

Key Laboratory for Advanced Materials and Institute of Fine Chemicals, East China University of  
Science & Technology, Shanghai 200237, China

E-mail: [zoulei@ecust.edu.cn](mailto:zoulei@ecust.edu.cn) ;

Fax: +86 21-642527588; Tel: +86-21-64252758

### Scheme S1. Synthetic route of compounds **1o** and **2o**

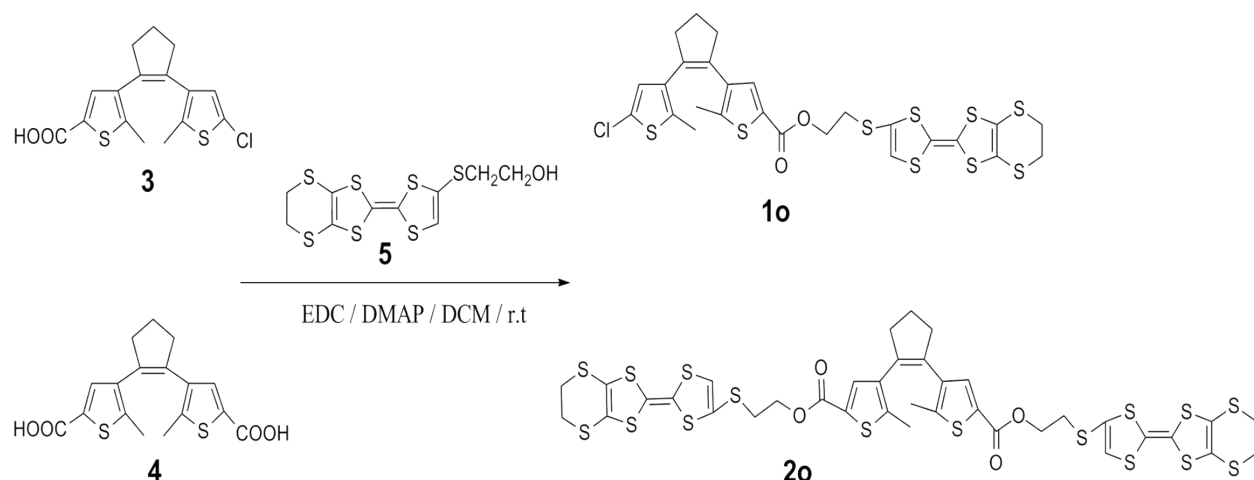

### Experimental

#### General methods 4-(2-Hydroxyethylthio)-4',5'-(ethylenedithio)tetrathiafulvalene **5**

1-(2-methyl-5-carboxyl-3-thienyl)-2-(2-methyl-5-chloro-3-thienyl) **3** and 1,2-bis(2-methyl-5-carboxyl-3-thienyl) cyclopentene **4** were synthesized according to the literature.<sup>1,2</sup> Other reagents were commercially available and used without further purification. <sup>1</sup>H NMR and <sup>13</sup>C NMR spectra were recorded on a Bruker AM-400 spectrometer in CDCl<sub>3</sub> solution using tetramethylsilane as the internal standard. High resolution mass spectra (HRMS) were recorded on a Waters LCT Premier XE spectrometer using standard conditions. (ESI, 70eV)

UV-vis absorption spectra were measured on a Varian Cary 500 UV-vis spectrophotometer. The photochromic reaction was induced in situ by continuous irradiation using an Hg/Xe lamp (Hamamatsu, LC8 Lightningcure, 200 W) equipped with a narrow band interference filter (Shenyang HB optical Technology) for  $\lambda_{\text{irr}} = 313$  nm, a broad-band interference filter (Shenyang HB optical Technology) for  $\lambda_{\text{irr}} > 470$  nm, or a monochromator (Monoscan 2000, OceanOptics) for  $\lambda_{\text{irr}} = 517$  nm. The photochromic reaction quantum yields were evaluated by the standard procedures

using BTF6 (1,2-bis(2-methylbenzo[b]thiophen-3-yl)perfluoro-cyclopentene) as the references for photocyclization and cycloreversion. The rates of isomerization in the initial stage of the reaction (0–5%) were compared with references whose  $\Phi_{o-c}$  (35%) and  $\Phi_{c-o}$  (35%) in hexane are known, which brought forth 5% uncertainties on the calculations of quantum yields. Electrochemical Characterization was performed by Versa Star II Electrochemical analyzer in  $\text{CH}_2\text{Cl}_2$  (distilled over  $\text{CaH}_2$  prior to use) containing 0.1M Tetrabutylammonium hexafluorophosphate ( $n\text{-Bu}_4\text{NPF}_6$ ) as supporting electrolyte. A platinum filament as counter electrode (CE), and an Ag/AgCl wire as reference electrode. Cyclic voltammetry measurements were carried out at a platinum electrode as work electrode (WE). Spectroelectrochemical experiments were carried out using a platinum plate as working electrode (WE).

### Synthesis of compound **1o**

At room temperature, a mixture of 0.1 g (0.3 mmol) product **3**, 0.074 g (0.2 mmol) product **5**, catalyst 4-dimethylaminopyridine (DMAP) 0.02 g, and water-absorbing agent 1-(3-Dimethylaminopropyl)-3-ethylcarbodiimide hydrochloride (EDC) 0.076 g dissolved in dichloromethane (DCM) 15 mL and stirred for 10h in dark conditions. Then the solvent was evaporated by rotary evaporator. The crude product was purified through column chromatography on silica using dichloromethane/petroleum ether (1:1.5) as the eluent. Compound **1o** was separated in 58% yield as orange solid.  $^1\text{H}$  NMR (400 MHz,  $\text{CDCl}_3$ ):  $\delta$  7.52 (s, 1H), 6.57 (s, 1H), 6.46 (s, 1H), 4.43 (t,  $J = 6.2$  Hz, 2H), 3.29 (s, 4H), 3.06 (t,  $J = 6.2$  Hz, 2H), 2.76 (dd,  $J = 15.8, 8.1$  Hz, 4H), 2.04 (dd,  $J = 14.7, 7.3$  Hz, 2H), 1.97

(s, 3H), 1.83 (s, 3H).  $^{13}\text{C}$  NMR (101 MHz,  $\text{CDCl}_3$ ):  $\delta$  160.74, 142.45, 135.75, 133.89, 133.72, 133.22, 132.25, 127.55, 125.61, 124.76, 124.72, 124.32, 122.78, 116.33, 112.90, 112.87, 105.87, 62.26, 37.54, 33.21, 29.19, 28.68, 21.83, 13.84, 13.23. ESI-HRMS ( $m/z$ ): Calcd. for  $\text{C}_{26}\text{H}_{23}\text{O}_2\text{S}_9\text{Cl}$  ( $[\text{M}]^+$ ): 689.8873; Found: 689.8876.

### Synthesis of compound **2o**

Compound **2o** was prepared by an analogous method to that used for compound **1o** and obtained as a brownish red solid in a yield of 62%.  $^1\text{H}$  NMR (400 MHz,  $\text{CDCl}_3$ ):  $\delta$  7.50 (s, 2H), 6.45 (s, 2H), 4.43 (t,  $J = 6.1$  Hz, 4H), 3.29 (s, 8H), 3.05 (t,  $J = 6.1$  Hz, 4H), 2.80 (t,  $J = 7.2$  Hz, 4H), 2.13 – 2.02 (m, 2H), 1.93 (s, 6H).  $^{13}\text{C}$  NMR (101 MHz,  $\text{CDCl}_3$ ):  $\delta$  161.73, 143.42, 136.68, 134.87, 134.79, 128.74, 125.80, 123.82, 117.39, 113.95, 113.91, 106.91, 63.33, 38.67, 34.27, 30.23, 22.89, 14.94. ESI-HRMS ( $m/z$ ): Calcd. for  $\text{C}_{37}\text{H}_{32}\text{O}_4\text{S}_{16}$  ( $[\text{M}]^+$ ): 1051.7832; Found: 1051.7833.

### Preparation of PMMA films with 2wt% **1** and **2**-loaded PMMA

Compound **1** or **2** (2 mg) was dissolved in 4 mL of  $\text{CHCl}_3$ . The solution was filtered using membranes attached to a Teflon syringe, and then PMMA (200mg) was added to the solution standing until the PMMA was resolved. The solution was coated on a spin-coater with a spin rate of 1000—2000 r/min. The coated film was dried at room temperature for 12 h in a vacuum oven to give a transparent and homogeneous film.<sup>3</sup>

Table S1 Photochromic parameters of compounds **1** and **2** in  $\text{CH}_2\text{Cl}_2$

| Compd    | $\lambda_{\max}^a/\text{nm}$                                  | $\lambda_{\max}^b/\text{nm}$                                  | $\Phi^c$            |                     | $\alpha_{\text{pss}}^d(313\text{nm})/\%$ |
|----------|---------------------------------------------------------------|---------------------------------------------------------------|---------------------|---------------------|------------------------------------------|
|          | $\varepsilon \times 10^3 \text{ M}^{-1} \cdot \text{cm}^{-1}$ | $\varepsilon \times 10^3 \text{ M}^{-1} \cdot \text{cm}^{-1}$ | $\Phi_{\text{o-c}}$ | $\Phi_{\text{c-o}}$ |                                          |
| <b>1</b> | 249(37.1)                                                     | 515 (9.15)                                                    | 0.06                | 0.022               | 11                                       |
| <b>2</b> | 260 (46.4)                                                    | 550 (8.65)                                                    | 0.07                | 0.007               | 58                                       |

<sup>a</sup> Absorption maxima of open-ring forms;

<sup>b</sup> Absorption maxima of closed ring forms;

<sup>c</sup> Quantum yields of photocyclization at 313 nm and photocycloreversion at 517 nm, with uncertainty around  $\pm 5\%$  and  $\pm 0.5\%$ , respectively;

<sup>d</sup> Conversion yield at photostationary state (PSS) upon irradiation at 313 nm.

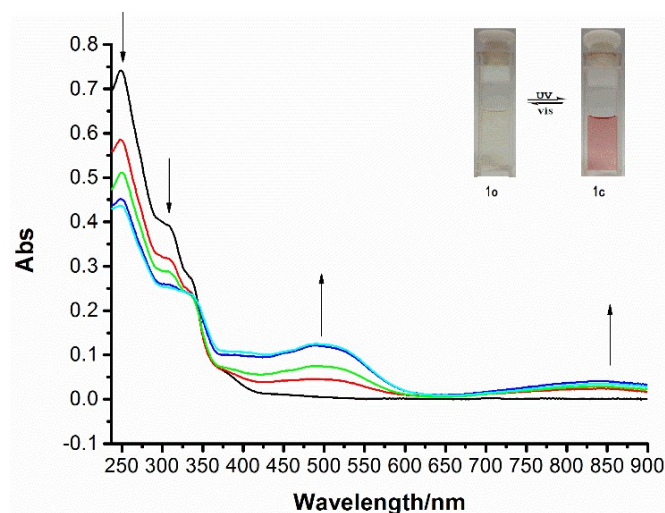

Fig. S1 UV-vis spectrum /color changes of compound **1o** in  $\text{CH}_2\text{Cl}_2$  ( $2.0 \times 10^{-5} \text{ mol} \cdot \text{L}^{-1}$ )

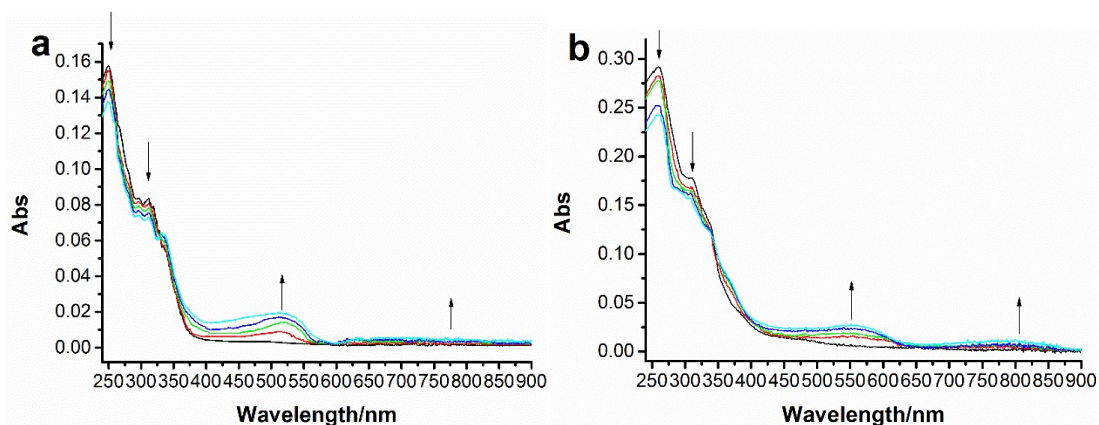

Fig. S2 UV-Vis absorption spectrum changes of 2 wt% **1** (a) and 2 wt% **2** (b) loaded PMMA film at 298 K upon irradiation with UV light.

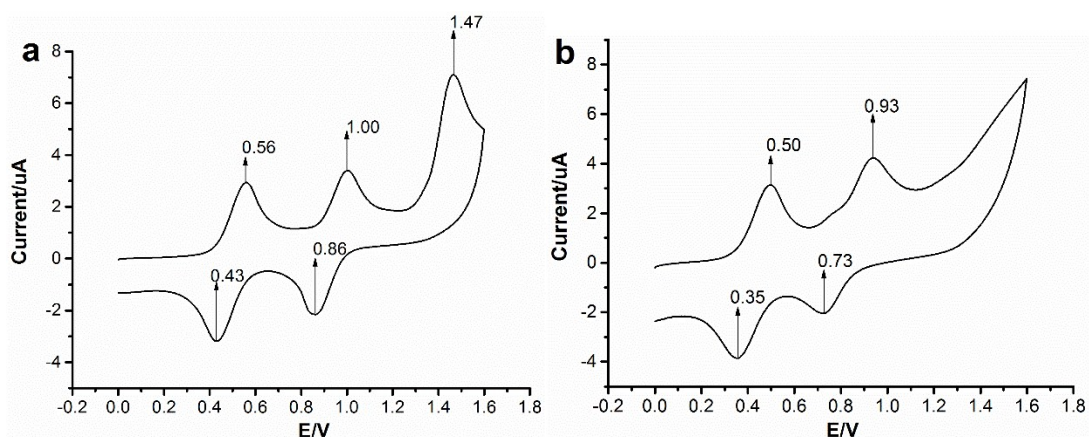

Fig. S3 Cyclic voltammograms of compound **1** in  $\text{CH}_2\text{Cl}_2$ : **1o** (a), **1c** (b). 0.1M tetrabutylammonium hexafluorophosphate as support electrolyte, with a scan rate of 50mV/s

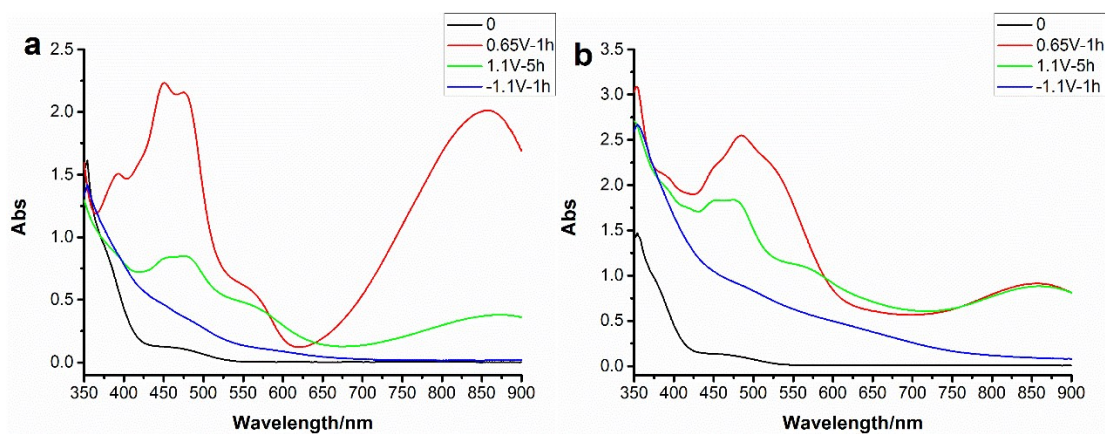

Fig. S4 Absorption spectra of **1o** (a) and **1c** (b) in  $\text{CH}_2\text{Cl}_2$  ( $2.5 \times 10^{-4} \text{ mol}\cdot\text{L}^{-1}$ ) after applying different potentials.

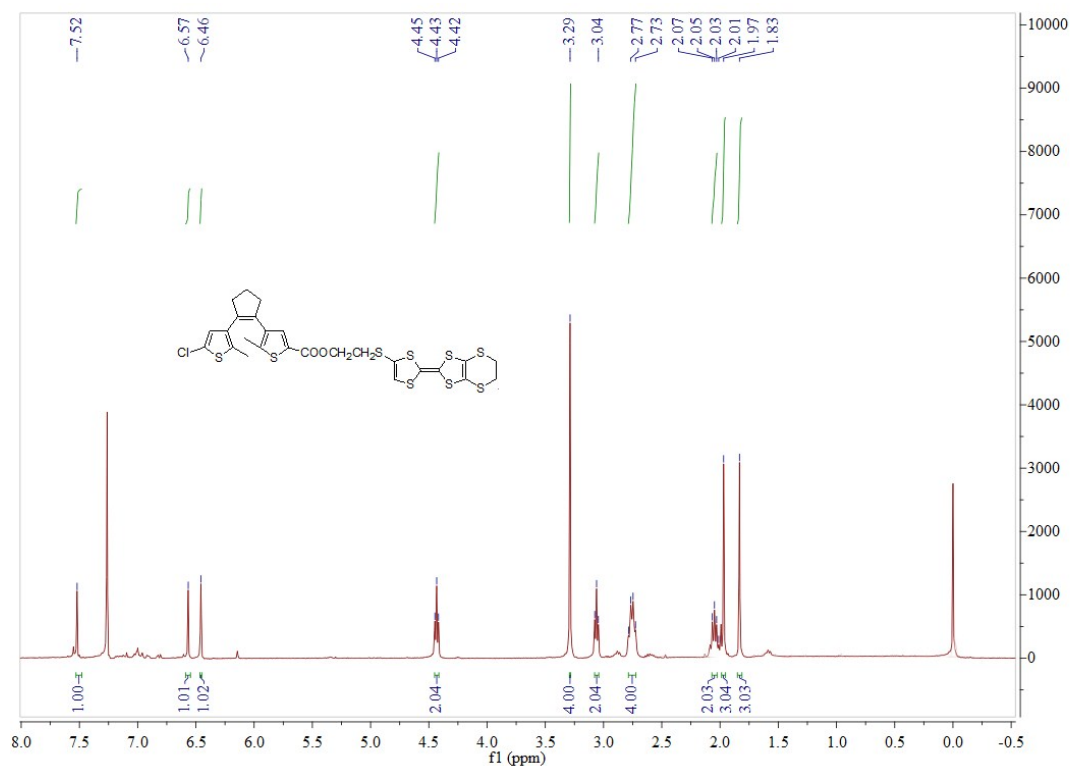

Fig. S5  $^1\text{H}$  NMR ( $\text{CDCl}_3$ , 400 MHz) spectrum of compound **1o**

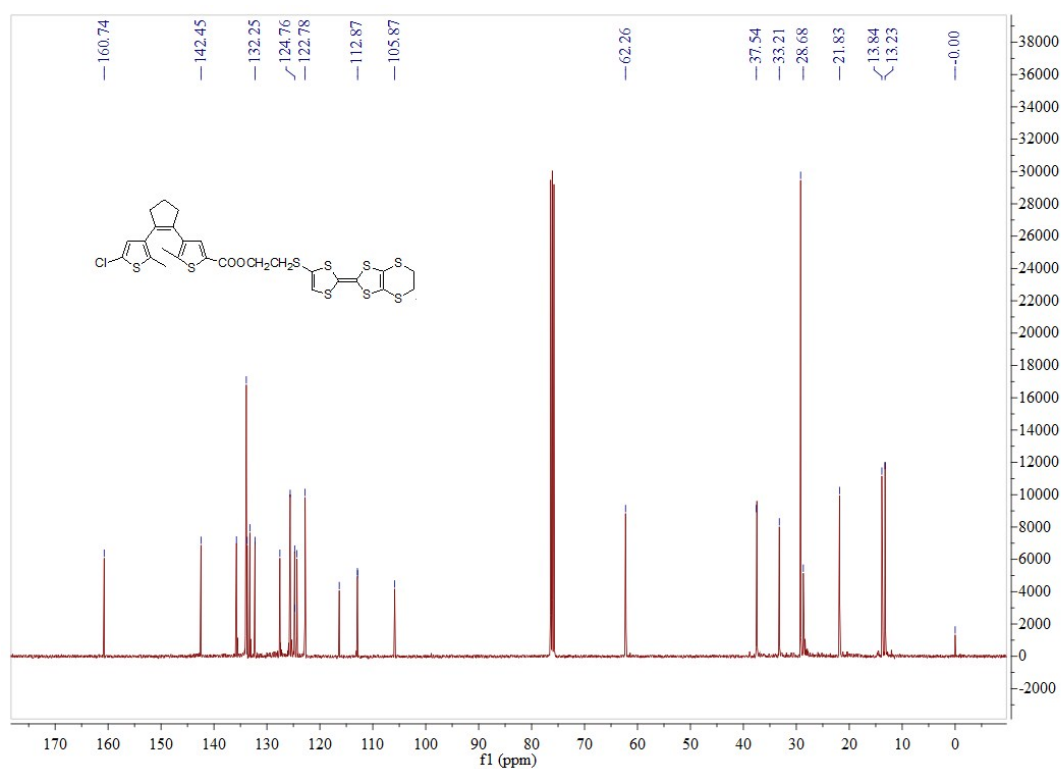

Fig. S6  $^{13}\text{C}$  NMR ( $\text{CDCl}_3$ , 100 MHz) spectrum of compound **1o**

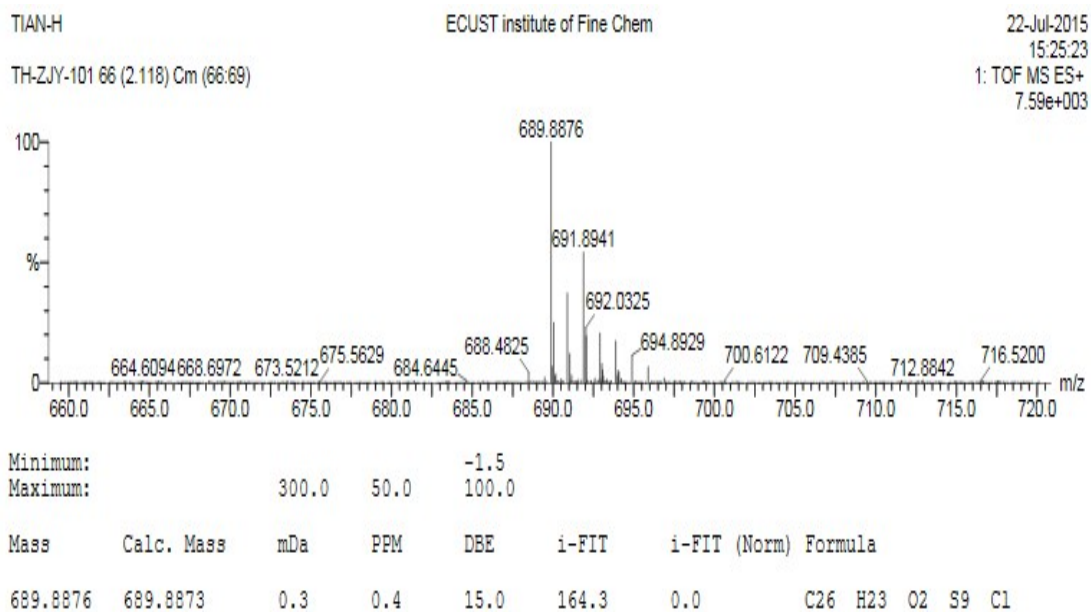

Fig. S7 High Resolution Mass spectra of compound **1o**

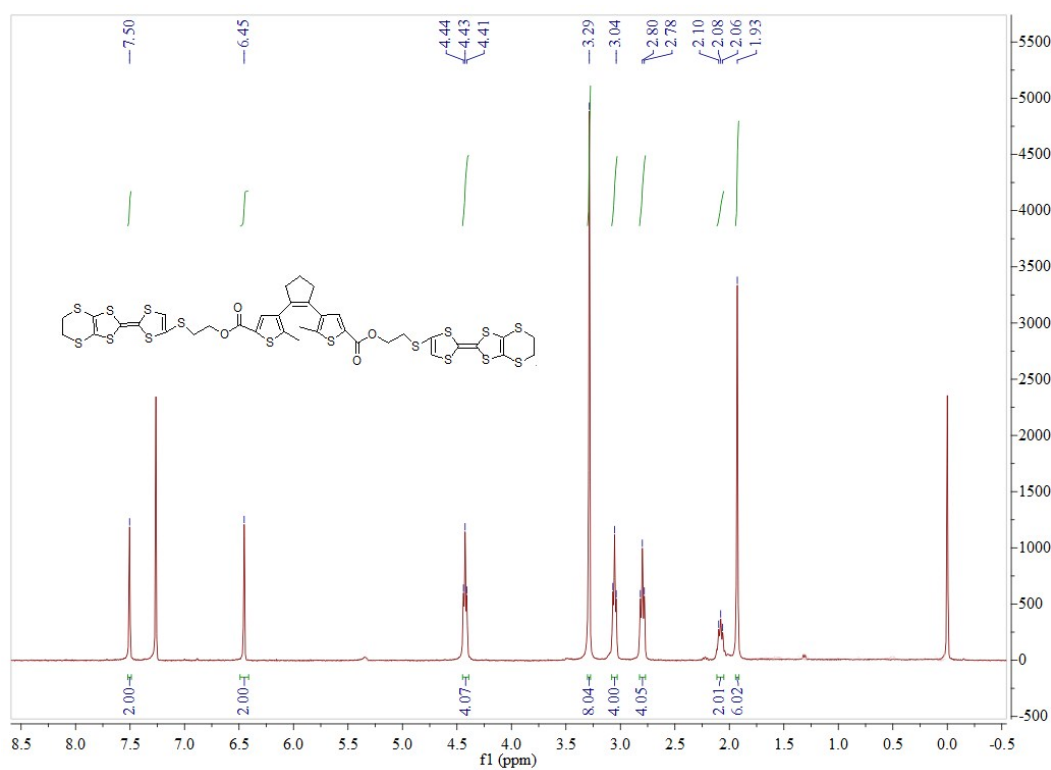

Fig. S8  $^1\text{H}$  NMR ( $\text{CDCl}_3$ , 400 MHz) spectrum of compound **2o**



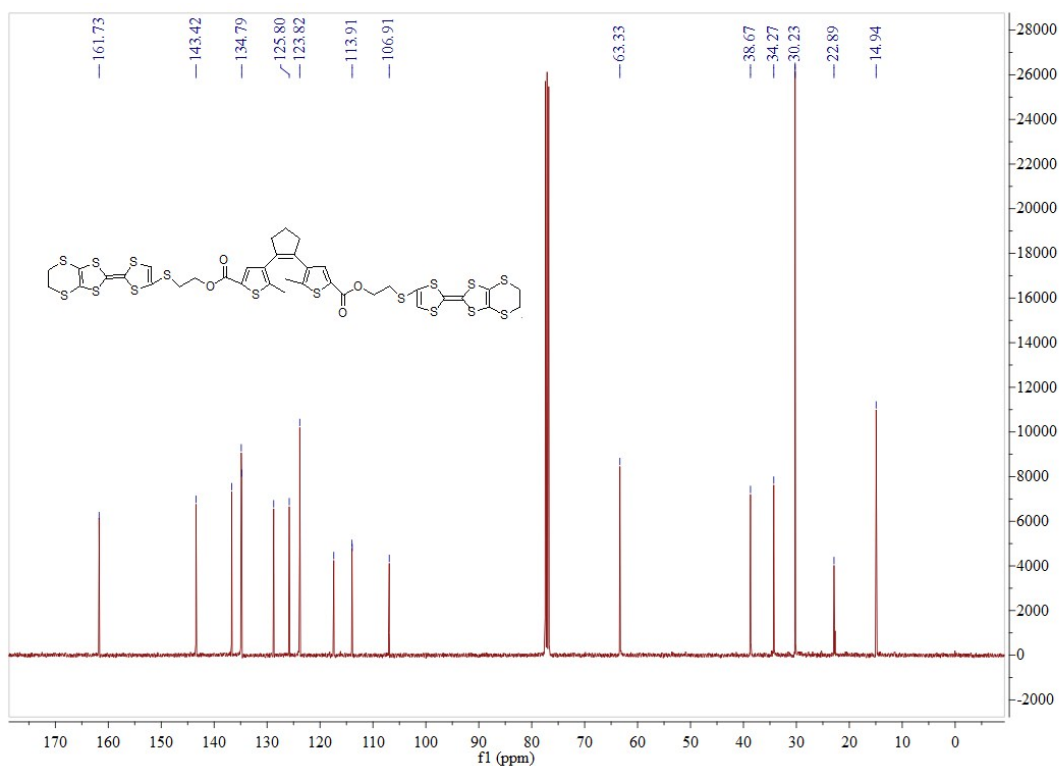

Fig. S9 <sup>13</sup>C NMR (CDCl<sub>3</sub>, 100 MHz) spectrum of compound **2o**

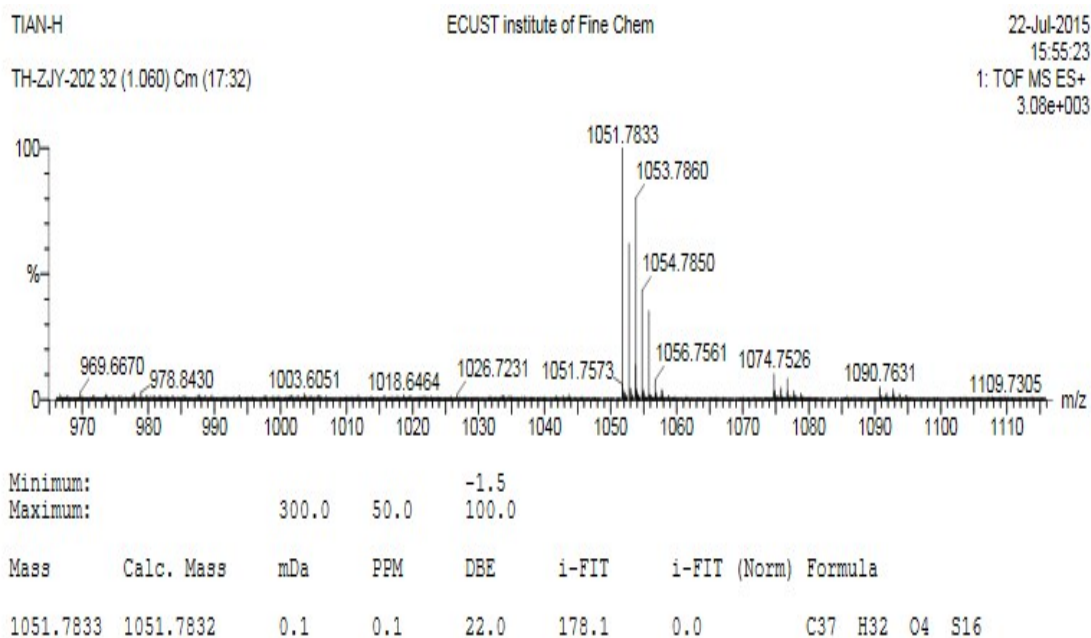

Fig. S10 High Resolution Mass spectra of compound **2o**

## References

1. L. Zou, W. Xu, X. Shao, D. Zhang, Q. Wang and D. Zhu, *Org. Biomol. Chem.*,

- 2003, **1**, 2157;
2. A. J. Myles and N. R. Branda, *Macromolecules*, 2003, **36**, 298;
  3. J. Jin and L. Zou, *Chin. J. Chem.*, 2011, **29**, 2445.
